# Supplementary material for: Phosphorus Modification of Iron: Mechanistic Insights into Ammonia Synthesis on Fe2P Catalyst
Source: MDPI journal article supplement (doi:10.3390/molecules29081894), 2024-04-22
Supplement: s1 [file s1]

# Phosphorus Modification of Iron: Mechanistic Insights into Ammonia Synthesis on Fe<sub>2</sub>P Catalyst

Abdulrahman Almithn

Department of Chemical Engineering, College of Engineering, King Faisal University,  
Al Ahsa 31982, Saudi Arabia; aalmithn@kfu.edu.sa

## S1. Computation Methods Details

The initial bulk structures for Fe (space group  $Im\bar{3}m$ ) and Fe<sub>2</sub>P (space group  $P\bar{6}2m$ ) were obtained from crystallographic data [43,44]. DFT optimization was then performed to determine lattice parameters, resulting in values of ( $a = b = c = 2.83$  Å) for Fe and ( $a = b = 5.81$  Å,  $c = 3.42$  Å) for Fe<sub>2</sub>P. Spin polarization was included in all calculations due to the ferromagnetic nature of Fe and Fe<sub>2</sub>P.

Frequency calculations were performed on gas-phase molecules and all optimized adsorbed species to determine zero-point vibrational energies (ZPVE) and vibrational, translational, and rotational enthalpy and free energy. These terms were then used, together with electronic energies ( $E_0$ , provided by VASP), to estimate enthalpies ( $H$ )

$$H = E_0 + \text{ZPVE} + H_{\text{vib}} + H_{\text{trans}} + H_{\text{rot}} \quad (\text{S1})$$

and free energies ( $G$ )

$$G = E_0 + \text{ZPVE} + G_{\text{vib}} + G_{\text{trans}} + G_{\text{rot}} \quad (\text{S2})$$

for reactants, products, and transition states at 673 K (a typical temperature for NH<sub>3</sub> synthesis). For calculations which include a periodic metal surface, there are no translational or rotational degrees of freedom, and DFT-derived vibrational frequencies can be used to determine the ZPVE,  $H_{\text{vib}}$ , and  $G_{\text{vib}}$

$$\text{ZPVE} = \sum_i (\frac{1}{2} \nu_i h) \quad (\text{S3})$$

$$H_{\text{vib}} = \sum_i \left( \frac{\nu_i h e^{-\frac{\nu_i h}{kT}}}{1 - e^{-\frac{\nu_i h}{kT}}} \right) \quad (\text{S4})$$

$$G_{\text{vib}} = \sum_i \left( -kT \ln \frac{1}{1 - e^{-\frac{\nu_i h}{kT}}} \right) \quad (\text{S5})$$

For gaseous molecules, translational and rotational enthalpies and free energies were also computed from statistical mechanics

$$H_{\text{trans}} = \frac{5}{2} kT \quad (\text{S6})$$

$$H_{\text{rot,linear}} = kT \quad (\text{S7})$$

$$H_{\text{rot,nonlinear}} = \frac{3}{2} kT \quad (\text{S8})$$

$$G_{\text{trans}} = -kT \ln \left[ \left( \frac{2\pi M kT}{h^2} \right)^{3/2} V \right] \quad (\text{S9})$$

$$G_{\text{rot}} = -kT \ln \left[ \frac{\pi^{1/2}}{\sigma} \left( \frac{T^3}{\theta_x \theta_y \theta_z} \right)^{1/2} \right] \quad (\text{S10})$$

$$\theta_i = \frac{h^2}{8\pi^2 I_i k} \quad (\text{S11})$$

where  $I_i$  is the moment of inertia about axes  $x$ ,  $y$ , or  $z$  and  $\sigma$  is the symmetry number of the molecule (2 for  $H_2$  and 6 for  $C_2H_6$ ). Equations S6–S10 were obtained from: McQuarrie, D. A.; Statistical Mechanics; Sausalito, CA [50].

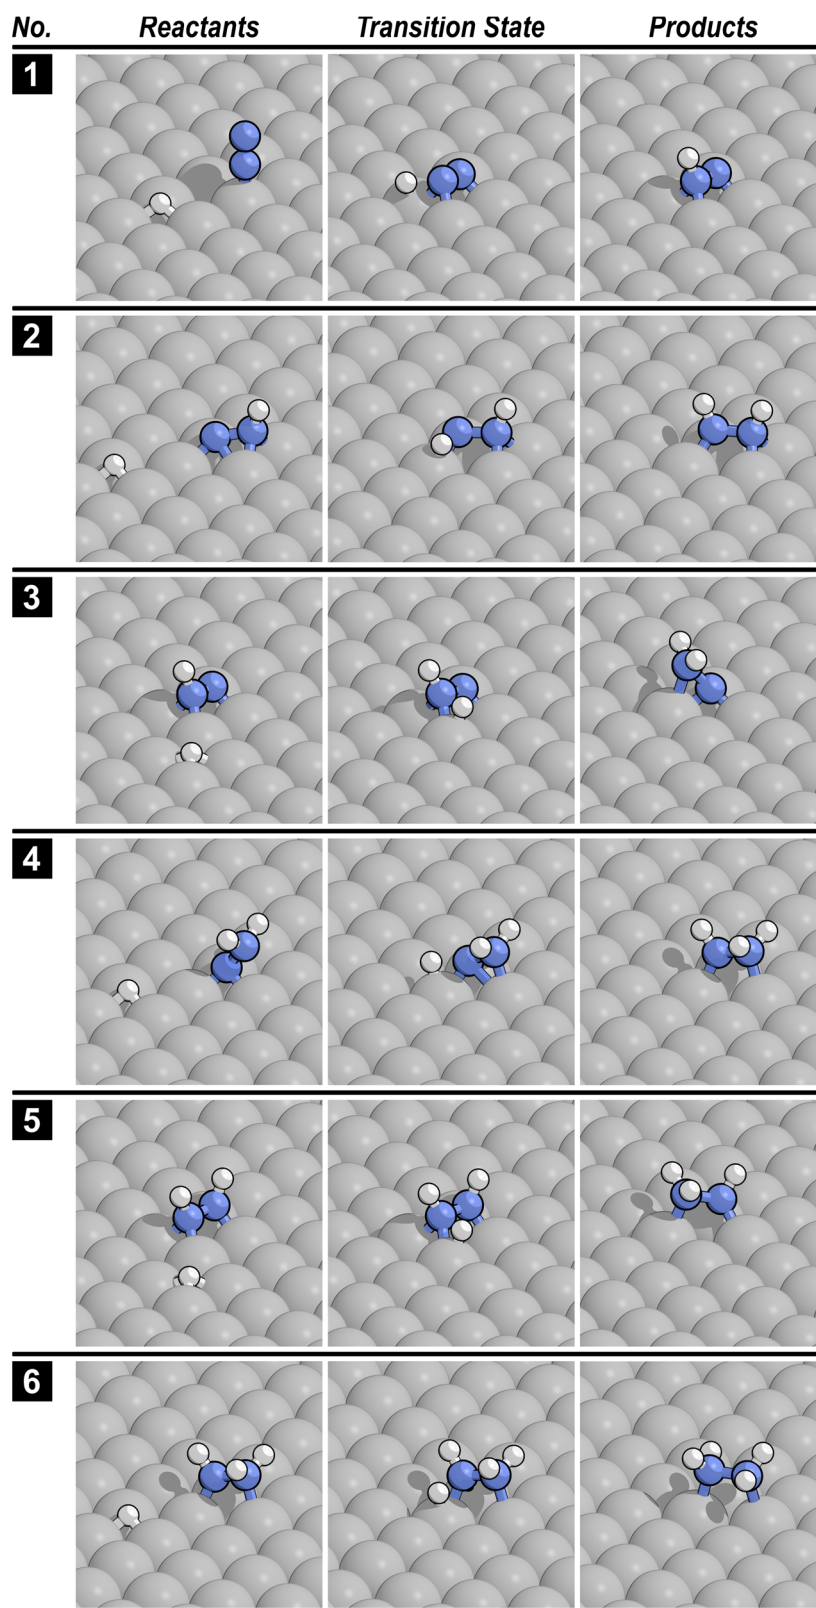

**Figure S1.** Reactants, transition state, and products' structures for all reactions examined over Fe(110) surface.

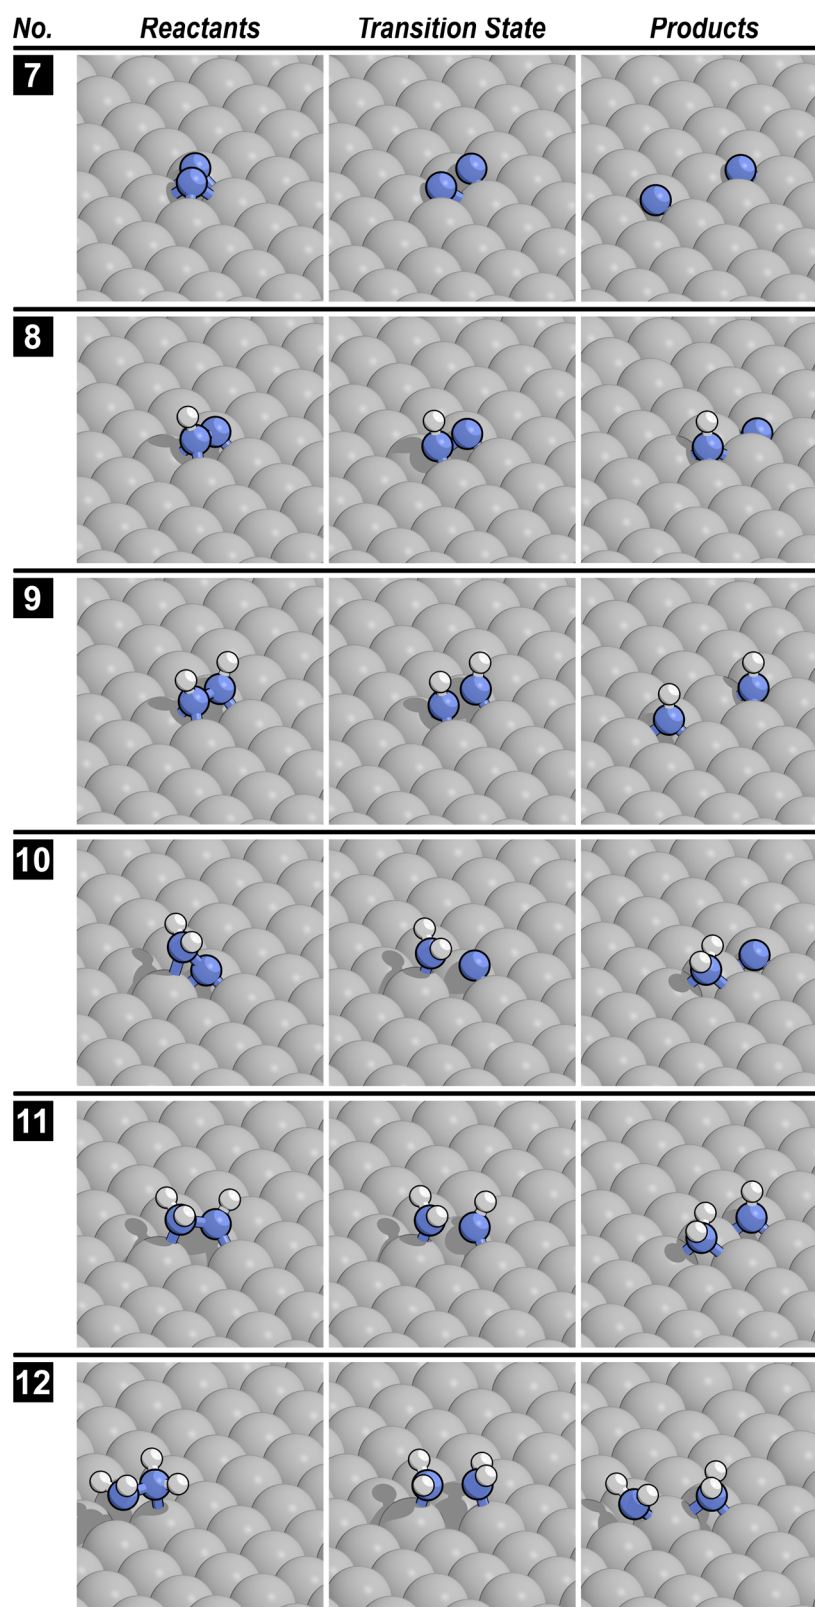

**Figure S1 Cont.** Reactants, transition state, and products' structures for all reactions examined over Fe(110) surface.

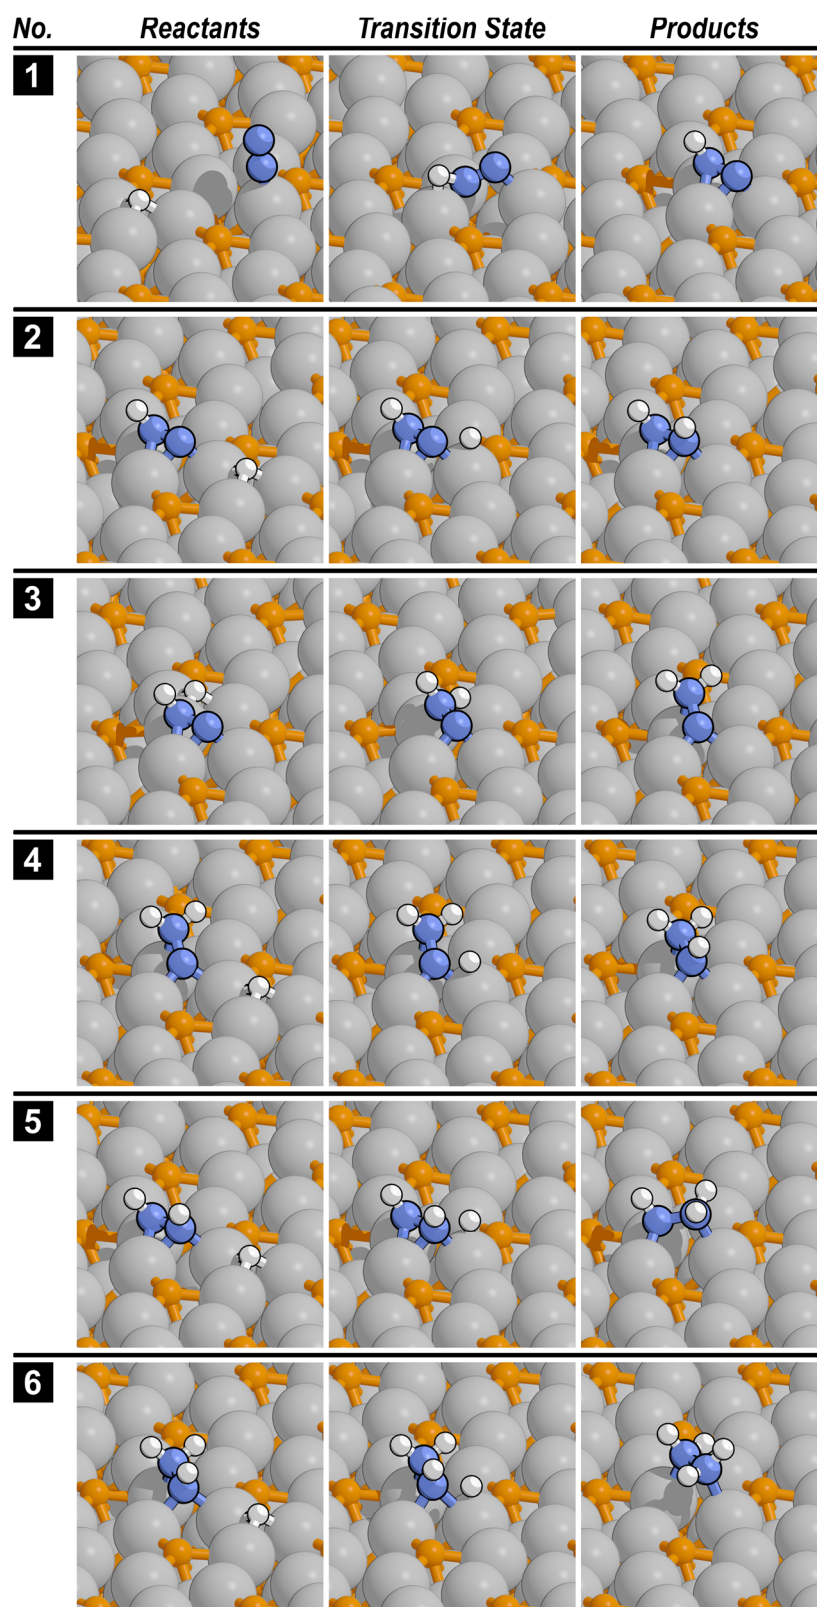

**Figure S2.** Reactants, transition state, and products' structures for all reactions examined over Fe<sub>2</sub>P(001) surface.



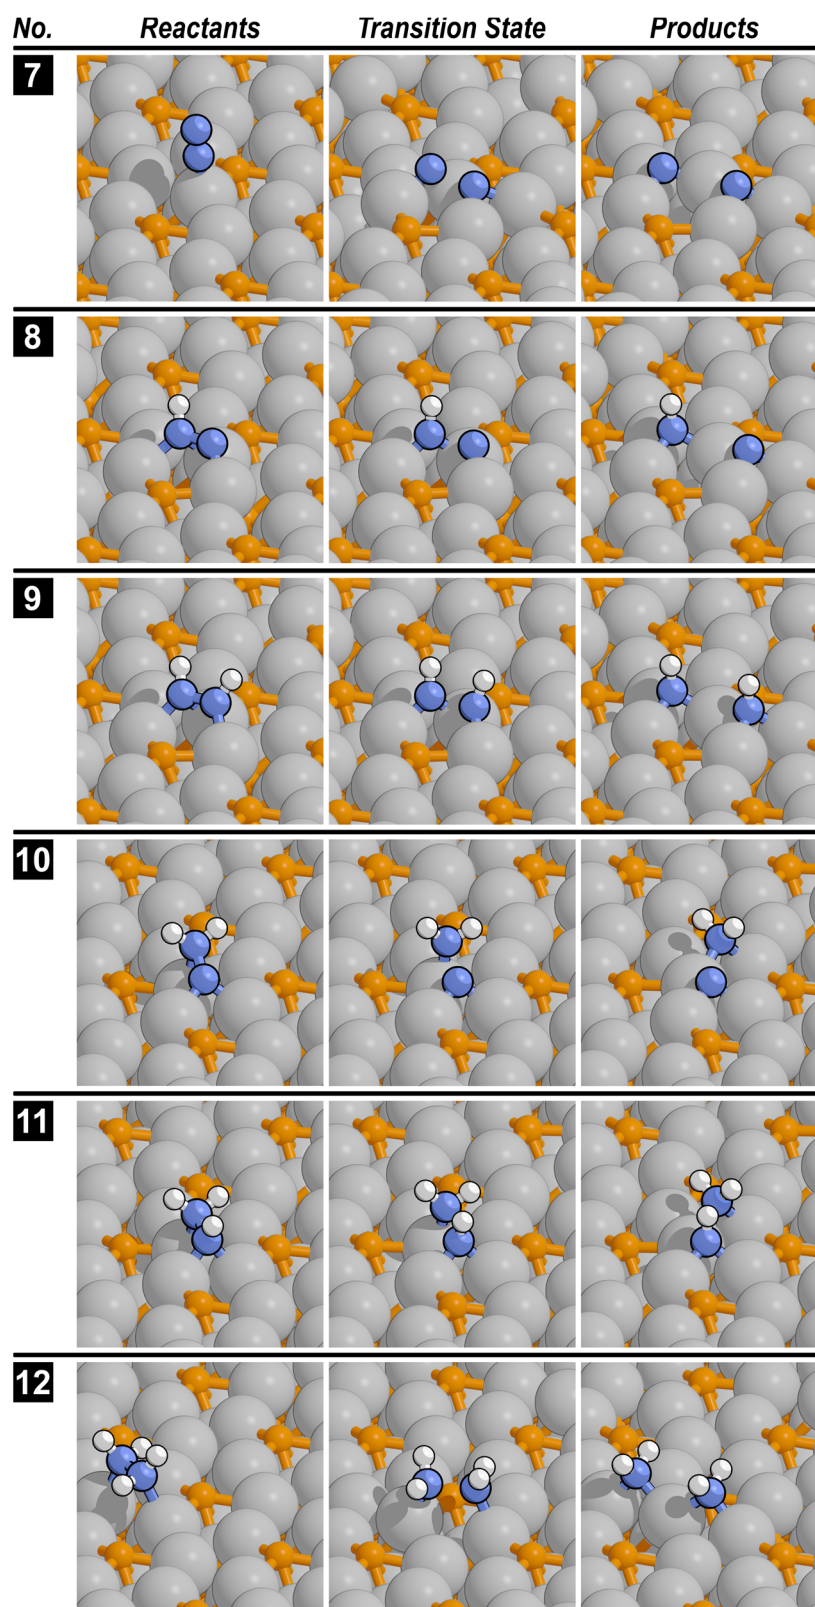

**Figure S2 Cont.** Reactants, transition state, and products' structures for all reactions examined over Fe<sub>2</sub>P(001) surface.

## References

43. Wilburn, D.R.; Bassett, W.A. Hydrostatic Compression of Iron and Related Compounds; an Overview. *Am. Mineral.* **1978**, *63*, 591–596.
44. Koumina, A.; Bacmann, M.; Fruchart, D.; Soubeyroux, J.-L.; Wolfers, P.; Tobola, J.; Kaprzyk, S.; Niziol, S.; Mesnaoui, M.; Zach, R. Crystallographic and Magnetic Properties of Fe<sub>2</sub>P. *Ann. Chim. Sci. Des Mater.* **1998**, *23*, 177–180.
50. McQuarrie, D.A. Statistical Mechanics; University Science Books: Sausalito, CA, USA, 2000.
